# Supplementary material for: Photoswitchable fluorescent polymeric nanoparticles for rewritable fluorescence patterning and intracellular dual-color imaging with AIE-based fluorogens as FRET donors
Source: Royal Society of Chemistry journal article supplement (doi:10.1039/c7py00834a), 2017-01-01
Supplement: c7py00834a1.pdf [file c7py00834a1.pdf]

## Electronic Supplementary Information

### Photoswitchable fluorescent polymeric nanoparticles for rewritable fluorescence patterning and intracellular dual-color imaging with AIE-based fluorogens as FRET donors

Weibang Zhong,<sup>a,†</sup> Xuyao Zeng,<sup>b,†</sup> Jian Chen,<sup>a,\*</sup> Yongxiang Hong,<sup>a</sup> Lehui Xiao<sup>b</sup> and Peisheng Zhang<sup>a,\*</sup>

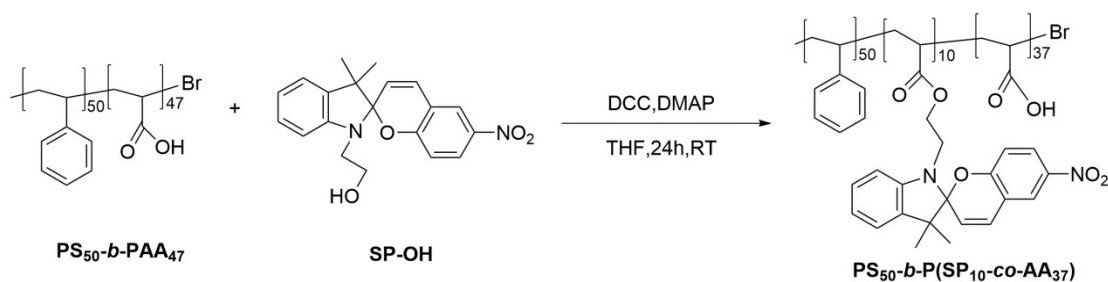

**Scheme S1.** Synthesis of amphiphilic photochromic copolymer PS<sub>50</sub>-*b*-P(SP<sub>10</sub>-*co*-AA<sub>37</sub>).

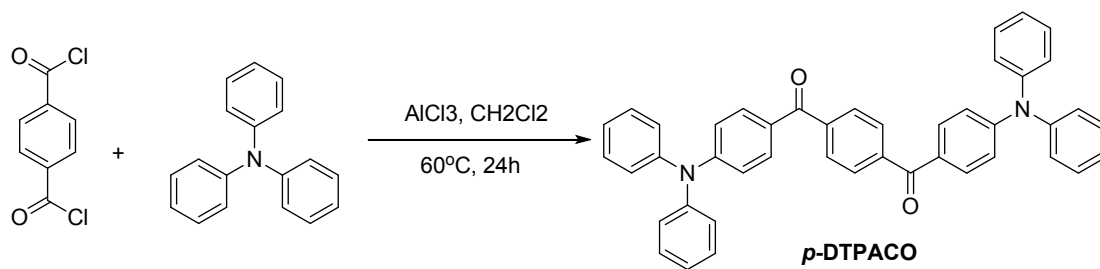

**Scheme S2.** Synthesis of 4-phenylenebis((4-(diphenylamino)phenyl)methanone) (*p*-DTPACO).

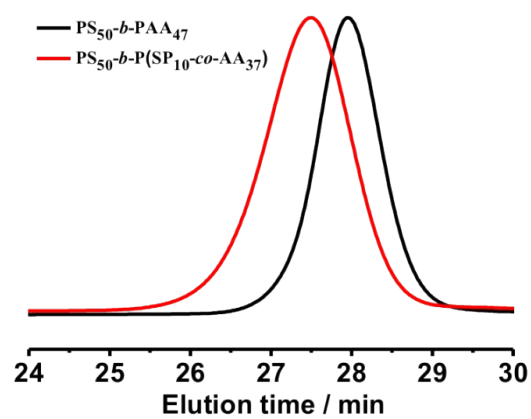

**Figure S1.** GPC trace of  $\text{PS}_{50}\text{-}b\text{-PAA}_{47}$  and  $\text{PS}_{50}\text{-}b\text{-P}(\text{SP}_{10}\text{-}co\text{-AA}_{37})$ .

Table S1. The molecular weight of PS<sub>50</sub>-*b*-PAA<sub>47</sub> and PS<sub>50</sub>-*b*-P(SP<sub>10</sub>-*co*-AA<sub>37</sub>)

| Sample                                                                                       | M <sub>n</sub> | M <sub>w</sub> | PDI  | SP units |
|----------------------------------------------------------------------------------------------|----------------|----------------|------|----------|
| PS <sub>50</sub> - <i>b</i> -PAA <sub>47</sub> <sup>a</sup>                                  | 6110           | 7260           | 1.19 | 0        |
| PS <sub>50</sub> - <i>b</i> -P(SP <sub>10</sub> - <i>co</i> -AA <sub>37</sub> ) <sup>b</sup> | 10370          | 12270          | 1.18 | 10       |

<sup>a</sup> Provide by product supplier. <sup>b</sup> Estimated from <sup>1</sup>H NMR spectra.

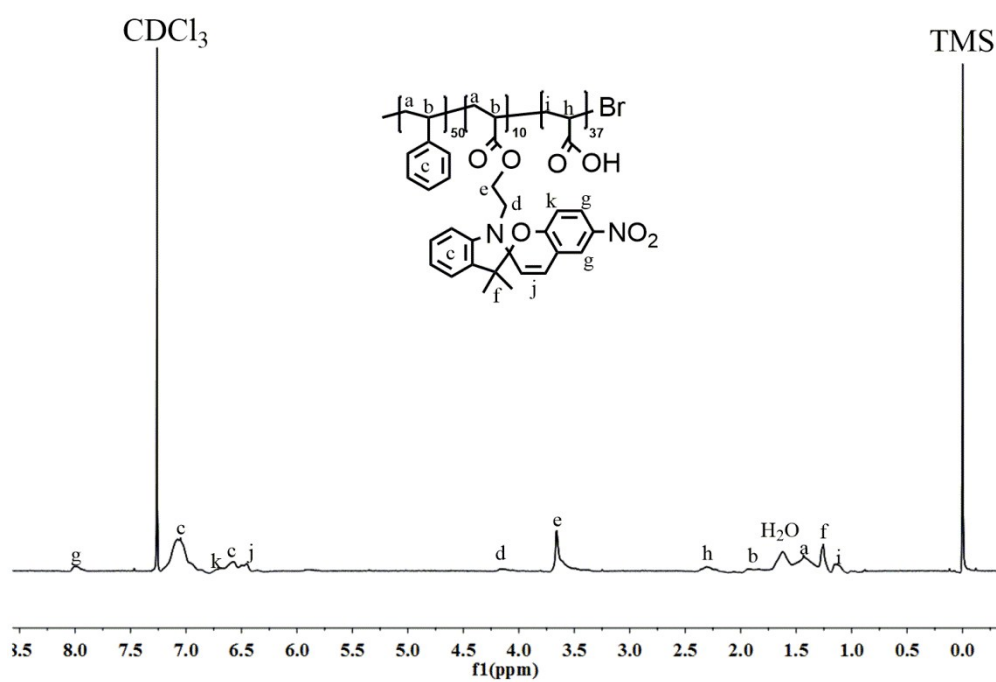

**Figure S2.**  $^1\text{H}$  NMR spectra (in  $\text{CDCl}_3$ ) of the target copolymer  $PS_{50}\text{-}b\text{-}P(SP_{10}\text{-}co\text{-}AA_{37})$ .

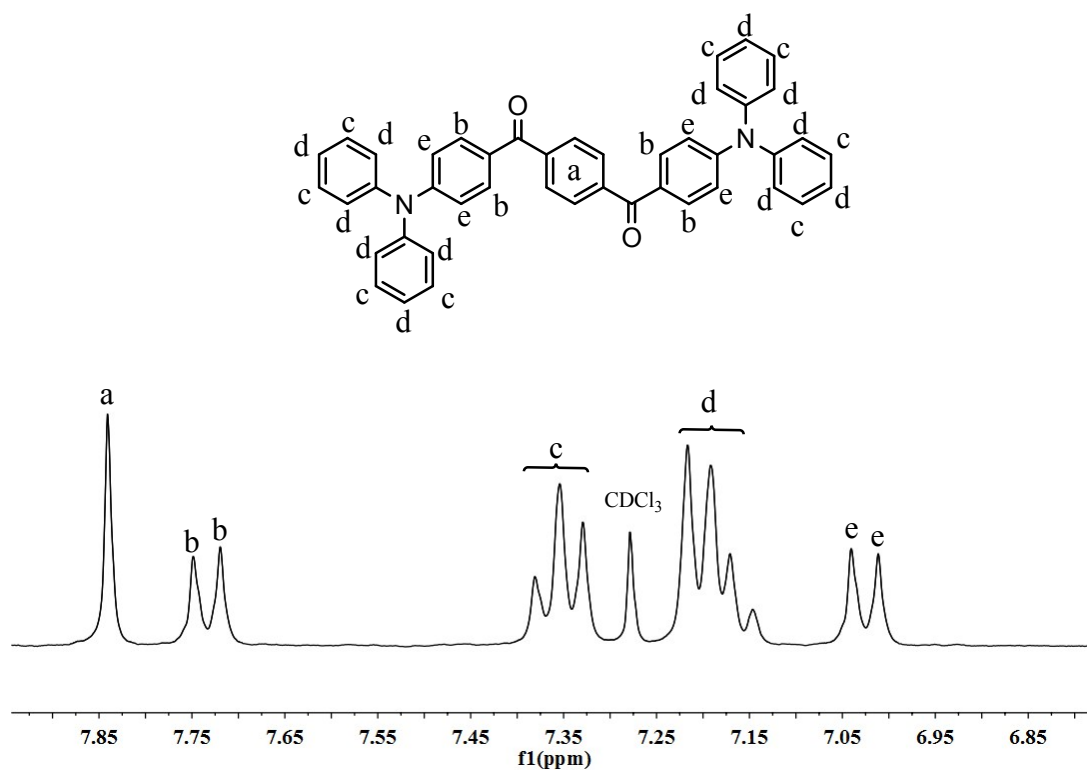

**Figure S3.** <sup>1</sup>H NMR spectra (in CDCl<sub>3</sub>) of the p-DTPACO.

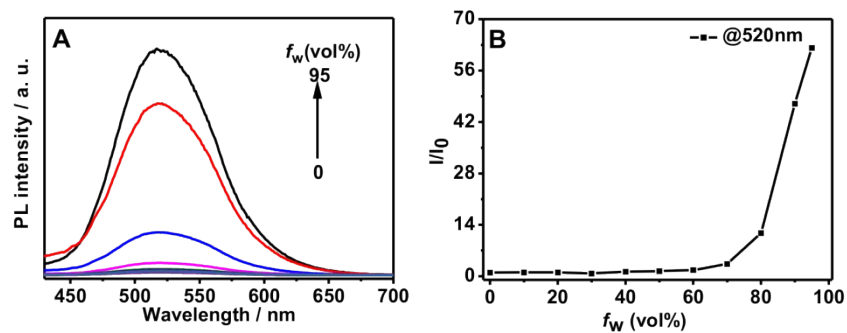

**Figure S4.** (A) The fluorescence emission spectra of p-DTPACO in water/THF mixtures with varied water content. (B) Plot of  $I/I_0$  at 520 nm versus water content ( $f_w$ ), where  $I_0$  is the fluorescence intensity in pure THF solution.  $\lambda_{\text{ex}}$  = 410 nm.

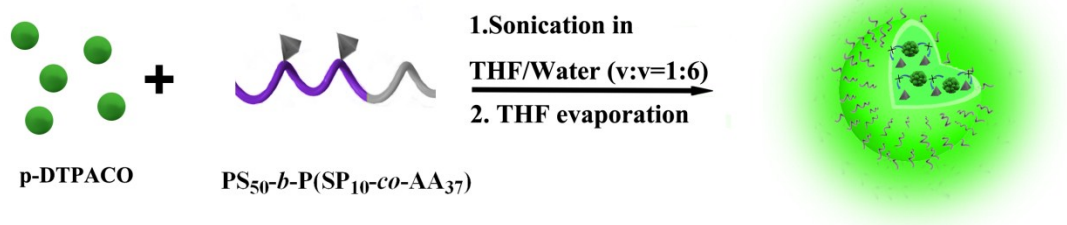

**Scheme S3.** Schematic illustration of PFPNs formation in aqueous suspension.



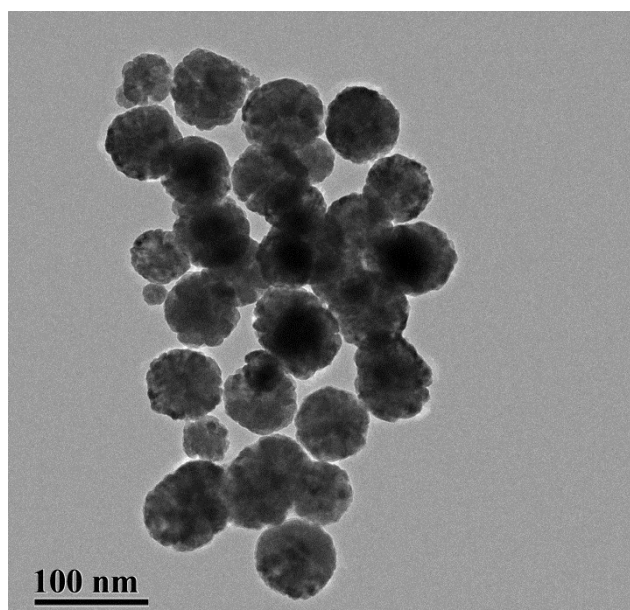

**Figure S5.** TEM image of a nanoparticle sample (NP-N4).

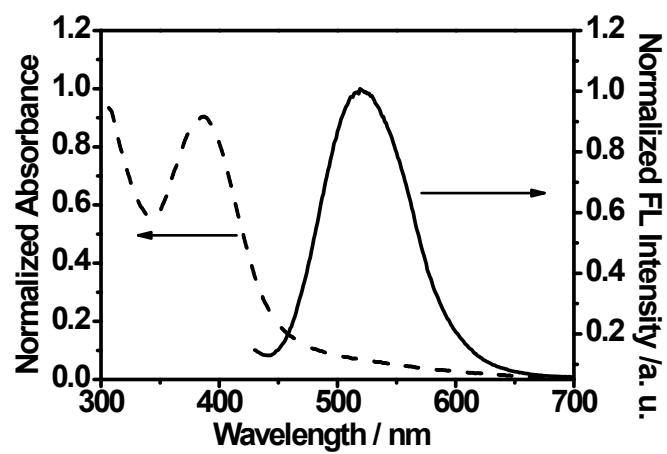

**Figure S6.** Normalized UV-vis absorption (dashed) and fluorescent (solid) spectra of nanoparticles contained only p-DTPACO.

Table S2. The photophysical properties of PFPNs (NP-N4).

| Fluorophore           | $\lambda_{ab}$ (nm) <sup>a</sup> | $\epsilon$ (mol <sup>-1</sup> ·L·cm <sup>-1</sup> ) <sup>a</sup> | $\lambda_{em}$ , nm ( $\Phi_F$ , %) <sup>b</sup> | $\lambda_{em}$ , nm ( $\Phi_F$ , %) <sup>c</sup> |
|-----------------------|----------------------------------|------------------------------------------------------------------|--------------------------------------------------|--------------------------------------------------|
| p-DTPACO (donor)      | 376                              | 38400                                                            | 520 (19.19)                                      | 520 (0.01)                                       |
| spiropyran (acceptor) | 340                              | 8780                                                             | --                                               | 650 (8.66)                                       |

<sup>a</sup> Determined in dichloromethane;

<sup>b</sup> Emission maximum in nanoparticles dispersions (quantum yield given in the parentheses) before UV irradiation.

<sup>c</sup> Emission maximum in nanoparticles dispersions (quantum yield given in the parentheses) after 1 min UV irradiation.

Note: the quantum yields are measured by using an Edinburgh FLS920 (UK) fluorescence spectrometer equipped with an integrating sphere detector.

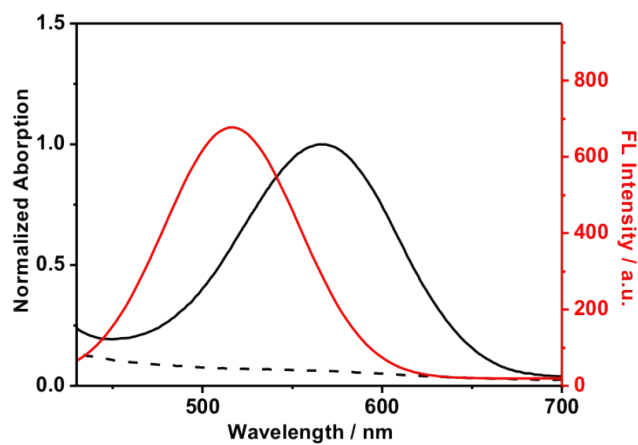

**Figure S7.** Absorption spectra of the SP state (black dashed curve) and MC state (black solid curve) of spiropyran units in polymer nanoparticles sample (NP-N1) and fluorescence emission spectra of nanoparticles contained only p-DTPACO (red solid curve).

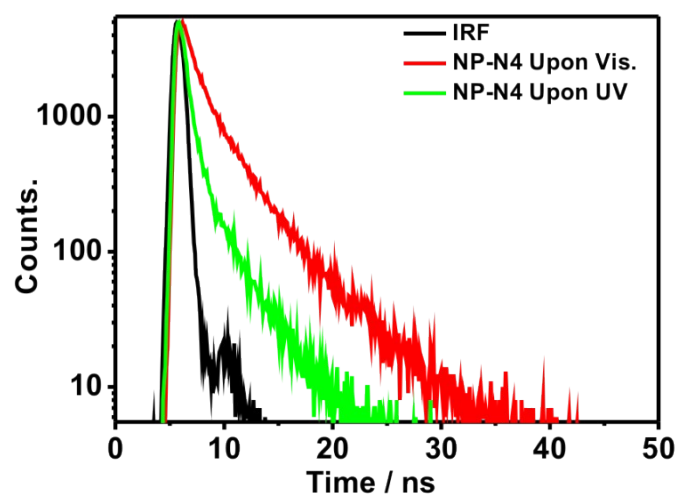

**Figure S8.** Fluorescence decay curves of the nanoparticles sample NP-N4 upon UV/vis light irradiation (0.125 mg/mL,  $\lambda_{\text{ex}} = 405$  nm, detection wavelength = 520 nm).

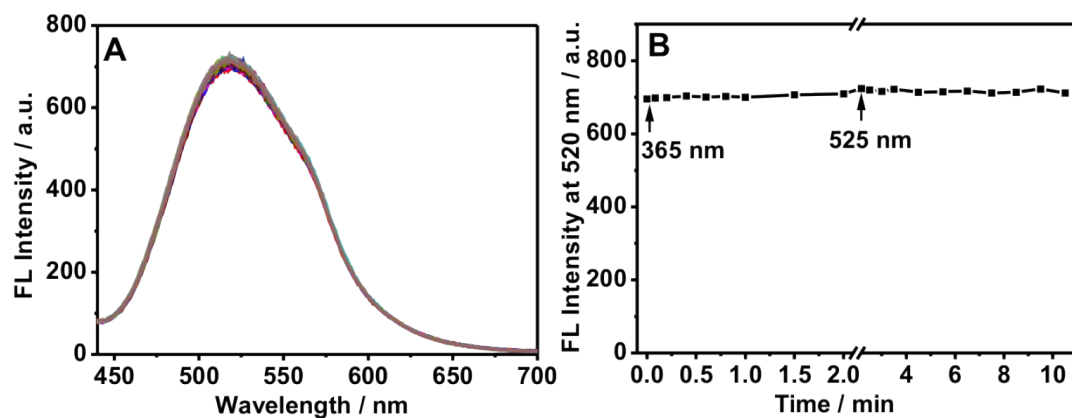

**Figure S9.** Fluorescent emission spectra (A) and intensity changes at 520 nm for the nanoparticles contained only p-DTPACO via irradiating with UV (365 nm) and visible light (525 nm).

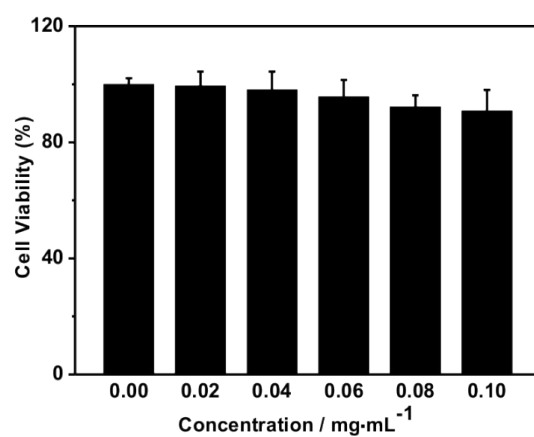

**Figure S10.** Cell viability of HeLa cells in the presence of NP-N4 at varied concentrations. The results are the mean standard deviation of eight separate measurements.

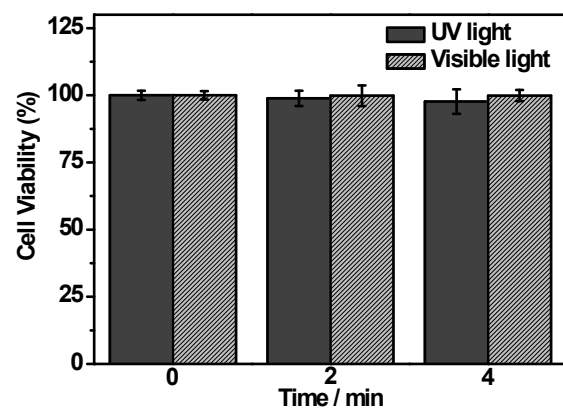

**Figure S11.** Cell viability of HeLa cells treated with the PFPNs (0.05 mg/mL) before and after irradiation with UV (365 nm, 2.8 mW/cm<sup>2</sup>) and visible light (525 nm, 1.34 mW/cm<sup>2</sup>) for 4 min, respectively; The results are the mean standard deviation of eight separate measurements.



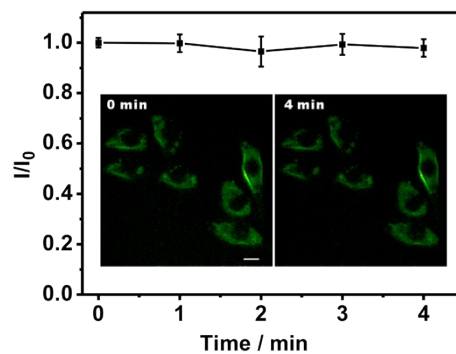

**Figure S12.** Photostability of the nanoparticles contained only p-DTPACO upon continuous irradiation by UV (365 nm, 2.8 mW/cm<sup>2</sup>) for 0 to 4 min.  $I_0$  is the initial fluorescence intensity and  $I$  is the fluorescence intensity of the sample after continuous scanning for designated time interval. The inset shows the corresponding fluorescence images at 0 and 4 min. Scale bar: 20  $\mu$ m.
